# Supplementary figures and images for: Comprehensive Comparative Analysis of the JAZ Gene Family in Common Wheat (Triticum aestivum) and Its D-Subgenome Donor Aegilops tauschii
Source: MDPI journal article supplement (doi:10.3390/plants13091259), 2024-04-30

**Figure S3**

**A**

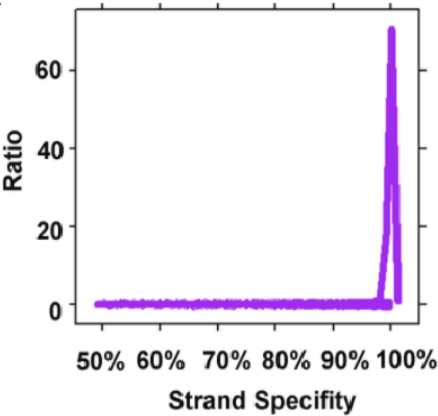

**B**

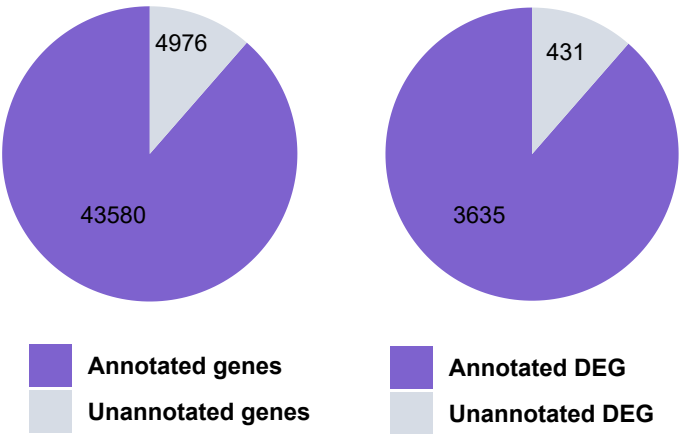

Supplement: s1 [file s1]

**Figure S1**

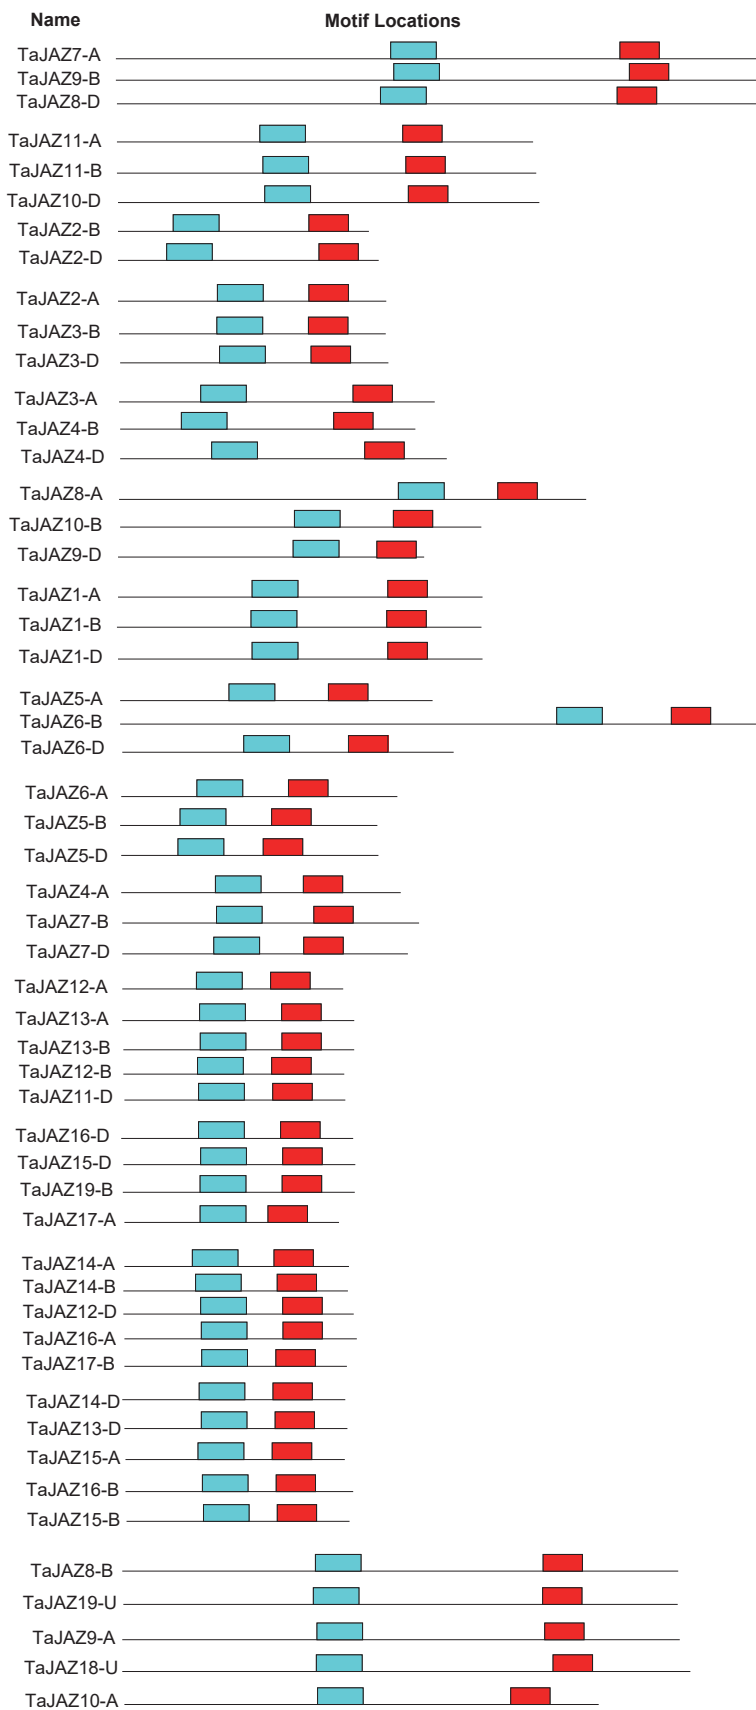

Supplement: s1 [file s1]

Figure S2

A

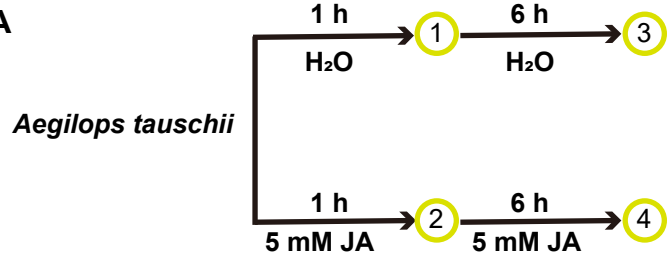

C

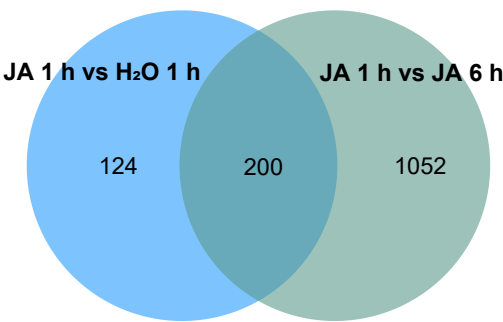

B

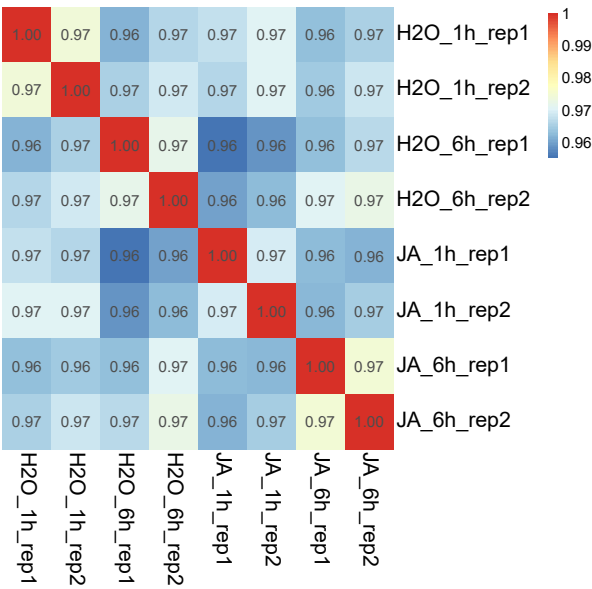

Supplement: s1 [file s1]
